# Supplementary material for: Clinical Outcome of Rotational Atherectomy in Calcified Lesions in Korea-ROCK Registry
Source: MDPI journal article supplement (doi:10.3390/medicina57070694), 2021-07-07
Supplement: s1 [file s1]

## **Supplementary Appendix**

This appendix has been provided by the authors to give readers additional information about their work. Supplement to: K Lee, JH Jung, M Lee et al. “Clinical Outcome of Rotational atherectomy in Calcified lesions in Korea – ROCK Registry”.

**Supplement Table S1.** Clinical characteristics according to clinical presentation among patients received PCI successfully.

**Supplement Table S2.** Lesion and procedural characteristics according to clinical presentation among patients received PCI successfully.

**Supplement Table S3.** Multivariable Cox Regression Analysis of Independent Predictors of all-cause death.

**Supplement Figure S1.** Kaplan-Meier curves for 3-year clinical outcomes according to clinical presentation.

**Supplement Table S1.** Clinical characteristics according to clinical presentation among patients received PCI successfully.

|                             | <b>ACS<br/>(n=326)</b> | <b>SA<br/>(n=215)</b> | <b>p value</b> |
|-----------------------------|------------------------|-----------------------|----------------|
| Age (years)                 | 72.4 ± 9.6             | 70.7 ± 9.8            | 0.049          |
| Male                        | 188 (57.7)             | 141 (65.6)            | 0.07           |
| BMI (kg/m <sup>2</sup> )    | 24.0 ± 3.8             | 24.6 ± 4.0            | 0.07           |
| Diabetes mellitus           | 183 (56.1)             | 120 (55.8)            | 0.94           |
| Insulin use                 | 41 (12.6)              | 31 (14.4)             | 0.54           |
| Hypertension                | 252 (77.3)             | 171 (79.5)            | 0.54           |
| Hyperlipidemia              | 132 (40.5)             | 110 (51.2)            | 0.015          |
| Current smoker              | 62 (19.0)              | 41 (19.1)             | 0.99           |
| Chronic kidney disease      | 61 (18.7)              | 39 (18.1)             | 0.87           |
| Prior MI                    | 40 (12.3)              | 26 (12.1)             | 0.95           |
| Prior PCI                   | 77 (23.6)              | 60 (27.9)             | 0.26           |
| Prior CABG                  | 15 (4.6)               | 8 (3.7)               | 0.62           |
| Peripheral vascular disease | 17 (5.2)               | 23 (10.7)             | 0.017          |
| History of heart failure    | 47 (14.4)              | 33 (15.3)             | 0.77           |
| History of CVA              | 56 (17.2)              | 20 (9.3)              | 0.01           |
| Atrial fibrillation         | 31 (9.5)               | 18 (8.4)              | 0.65           |
| LV EF, %                    | 51.4 ± 13.7            | 55.1 ± 12.9           | 0.002          |

Values are presented as n (%) or mean ± SD.

Abbreviations: SD, standard deviation; ACS, acute coronary syndrome; SA, stable angina; BMI, body mass index; MI, myocardial infarction; PCI, percutaneous coronary intervention; CABG, coronary artery by-pass grafting; CVA, cerebrovascular attack; LV EF, left ventricle ejection fraction.

**Supplement Table S2.** Lesion and procedural characteristics according to clinical presentation among patients received PCI successfully.

|                                         | <b>ACS<br/>(n=326)</b> | <b>SA<br/>(n=215)</b> | <b>p value</b> |
|-----------------------------------------|------------------------|-----------------------|----------------|
| ACC/AHA classification                  |                        |                       |                |
| Type B2/C                               | 310 (95.1)             | 196 (91.2)            | 0.07           |
| Target vessel                           |                        |                       | 0.27           |
| LAD                                     | 229 (70.2)             | 137 (63.7)            |                |
| LCX                                     | 26 (8.0)               | 19 (8.8)              |                |
| RCA                                     | 71 (21.8)              | 59 (27.4)             |                |
| LM disease                              | 51 (15.6)              | 29 (13.5)             | 0.49           |
| Multivessel disease                     | 275 (84.4)             | 167 (77.7)            | 0.049          |
| Femoral approach                        | 178 (54.6)             | 120 (55.8)            | 0.78           |
| IVUS or OCT                             | 139 (42.6)             | 114 (53.0)            | 0.018          |
| Number of stents (target-vessel)        | 1.64 ± 0.69            | 1.69 ± 0.66           | 0.40           |
| Mean stent diameter, mm (target-vessel) | 2.96 ± 0.35            | 3.06 ± 0.43           | 0.004          |
| Stent length, mm (target-vessel)        | 49.42 ± 21.65          | 49.99 ± 20.44         | 0.76           |

Values are presented as n (%) or mean ± SD.

Abbreviations: SD, standard deviation; ACS, acute coronary syndrome; SA, stable angina; ACC/AHA, American College of Cardiology/ American Heart Association; LAD, left anterior descending; LCX, left circumflex; RCA, right coronary artery; LM, left main; IVUS, intravascular ultrasound; OCT, optical coherence tomography.

**Supplement Table S3.** Multivariable cox regression analysis of independent predictors of all-cause death.

| Variables                         | Multivariate*     |       |
|-----------------------------------|-------------------|-------|
|                                   | HR (95% CI)       | p     |
| Acute coronary syndrome           | 1.94 (1.002-3.75) | 0.049 |
| Age                               | 1.04 (1.004-1.08) | 0.03  |
| Chronic kidney disease            | 2.36 (1.24-4.50)  | 0.009 |
| History of cerebrovascular attack | 1.99 (1.03-3.85)  | 0.041 |
| Use of intravascular image        | 0.45 (0.23-0.88)  | 0.021 |

\*adjusted by age, body mass index, current smoker, diabetes mellitus, hyperlipidemia, chronic kidney disease, history of cerebrovascular attack, history of heart failure, presented as acute coronary syndrome, atrial fibrillation, left main disease, multivessel disease, use of intravascular image, and mean stent diameter.  
HR, hazard ratio; CI, confidence interval.

**Supplement Figure S1.** Kaplan-Meier curves for 3-year clinical outcomes according to clinical presentation.

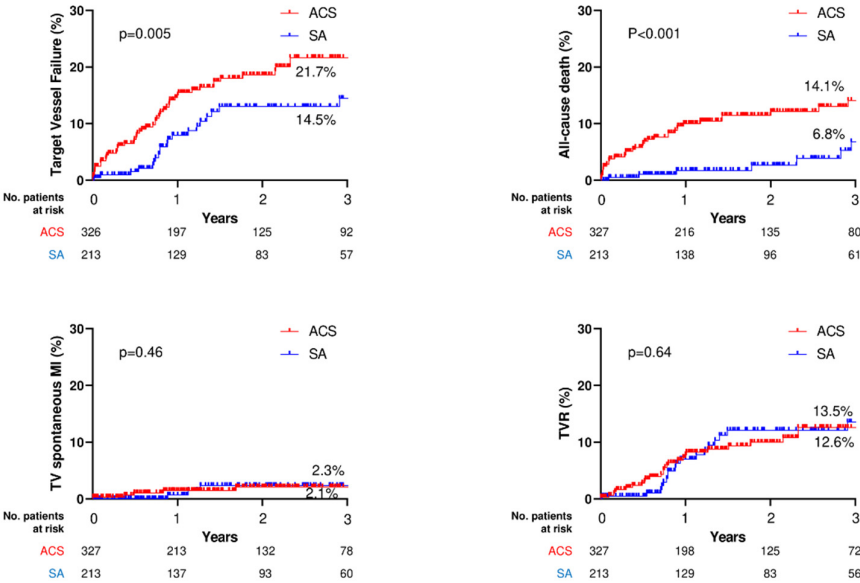

ACS, acute coronary syndrome; SA, stable angina; TV, target-vessel; MI, myocardial infarction; TVR, target vessel revascularization.
